# Supplementary material
Source: publisher figshare collection journal article supplement (https://frontiersin.figshare.com/ndownloader/files/24153509)
Supplement: Supplementary file [file 24153509]

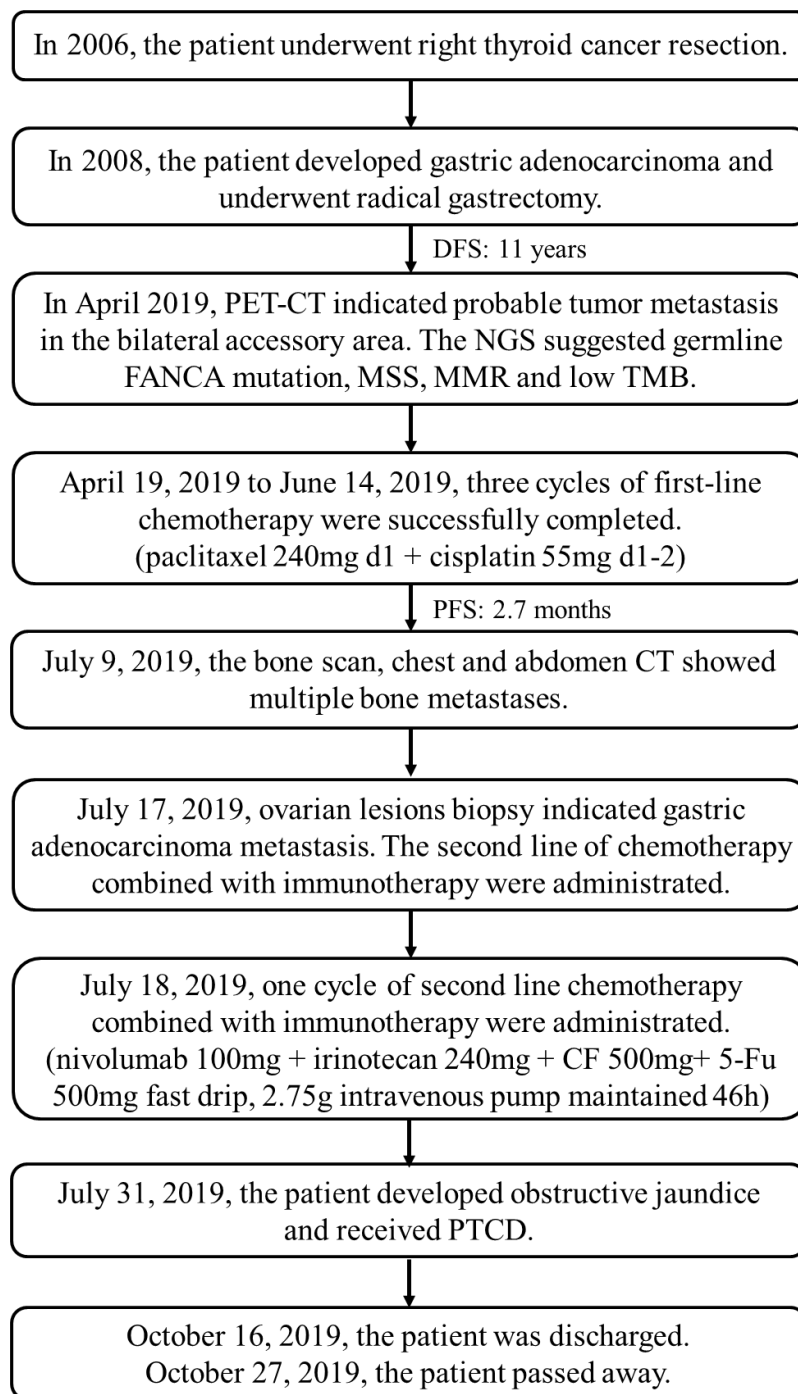

Supplementary Figure 1. Flow chart of the treatment in present patient.
